# Supplementary material for: Armored CAR T cells enhance antitumor efficacy and overcome the tumor microenvironment
Source: PubMed Central journal article supplement (PMC5585170; doi:10.1038/s41598-017-10940-8), 2017-09-05

**Armored CAR T cells enhance antitumor efficacy and overcome the tumor  
microenvironment**

Oladapo O. Yeku<sup>1</sup>, Terence J. Purdon<sup>1</sup>, Mythili Koneru, David Spriggs<sup>1</sup> and Renier J.  
Brentjens<sup>1,\*</sup>

<sup>1</sup>Department of Medicine, Memorial Sloan Kettering Cancer Center, New York, New  
York 10065, USA.

\*Correspondence to: Renier J. Brentjens; Email: [brentjer@mskcc.org](mailto:brentjer@mskcc.org)

**Supplementary figure 1. Transcriptome differences and functional assay on TAMs recovered from animals treated with 4H1128ζ-IL12 and 4H1128ζ CAR T cells. (a).** Heatmap representations of differentially expressed genes from pooled recovered TAMs from 4H1128ζ-IL12 and 4H1128ζ- treated mice. **(b).** MHC-II expression on recovered TAMs 48 hr after treatment with 4H1128ζ-IL12 or 4H1128ζ T cells. **(c).** Intracellular and secreted IL-6 and IL-10 levels from TAMs recovered from mice treated with either 4H1128ζ-IL12 and 4H1128ζ T cells. \*p < 0.05. Data are plotted as mean ± SEM. **(d).** Arginase activity in recovered TAMs from 4H1128ζ-IL12 and 4H1128ζ- treated mice. Data are plotted as mean ± SEM.

**Supplementary figure 2. Endogenous effectors are not required for IL-12 armored CAR T cell efficacy. (a).** Female C57BL/6 Ly5.1 mice between 6-8 weeks old were injected i.p with  $1 \times 10^7$  ID8-Muc16<sup>ecto</sup> cells and treated with 4H1128 $\zeta$  or 4H1128 $\zeta$ -IL12 CAR T cells derived from C57BL/6 Thy1.2 splenocytes. 48 hr after CAR T cell infusion, peritoneal washes were performed and stained for endogenous Ly5.1 T cells. Recovered Ly5.1 T cells were gated on the Muc16<sup>-</sup> F4/80<sup>-</sup> population of peritoneal cells, \*p = 0.04. Data are plotted as mean  $\pm$  SEM. Data shown are representative results from 3 independent experiments. **(b).** Female IFN- $\gamma$  knockout (IFN- $\gamma$ <sup>-/-</sup>) or CD8 knockout (CD8<sup>-/-</sup>) mice between 6-8 weeks old were treated with  $2 \times 10^6$  4H1128 $\zeta$  or 4H1128 $\zeta$ -IL12 CAR T cells derived from WT splenocytes 35 days after i.p tumor inoculation, \*p < 0.001, #p = 0.001. n= 5 mice per group. Statistical analysis performed using a log-rank (Mantel-Cox) test.

**Supplementary figure 3. Ascites-derived IFN- $\gamma$  induces upregulation of PD-L1 on ID8-Muc16<sup>ecto</sup> cells.** ID8-Muc16<sup>ecto</sup> cells cultured for 16 hr in the presence of PBS, pooled ascites with undetectable IFN- $\gamma$  or pooled ascites with IFN- $\gamma$ . IFN- $\gamma$  levels from PBS and ascities also shown.

**Supplementary figure 4. 4H1128ζ-IL12 CAR T does not lead to increased toxicity in mice. (a).** Serum cytokine levels obtained from tumor-bearing WT mice pre- and 7 days post infusion of 1928ζ, 1928ζ-IL12, 4H1128ζ and 4H1128ζ-IL12 T cells. \*p < 0.05. Data are plotted as mean ± SEM. **(b).** Non-tumor (NT) and tumor (T) bearing mice were treated with 2x10<sup>6</sup> i.v 4H1128ζ-IL12 T cells on D0 and 2x10<sup>6</sup> i.p 4H1128ζ-IL12 T cells on D1 (i.v/i.p) and subsequently weighed. **(c).** Following i.v/i.p infusion of 4H1128ζ-IL12, blood chemistries, hematologic, liver function and renal function parameters were measured at day 3 and day 16. \*p < 0.05, lymphocytes \*p < 0.05. Data are plotted as mean ± SEM.

a

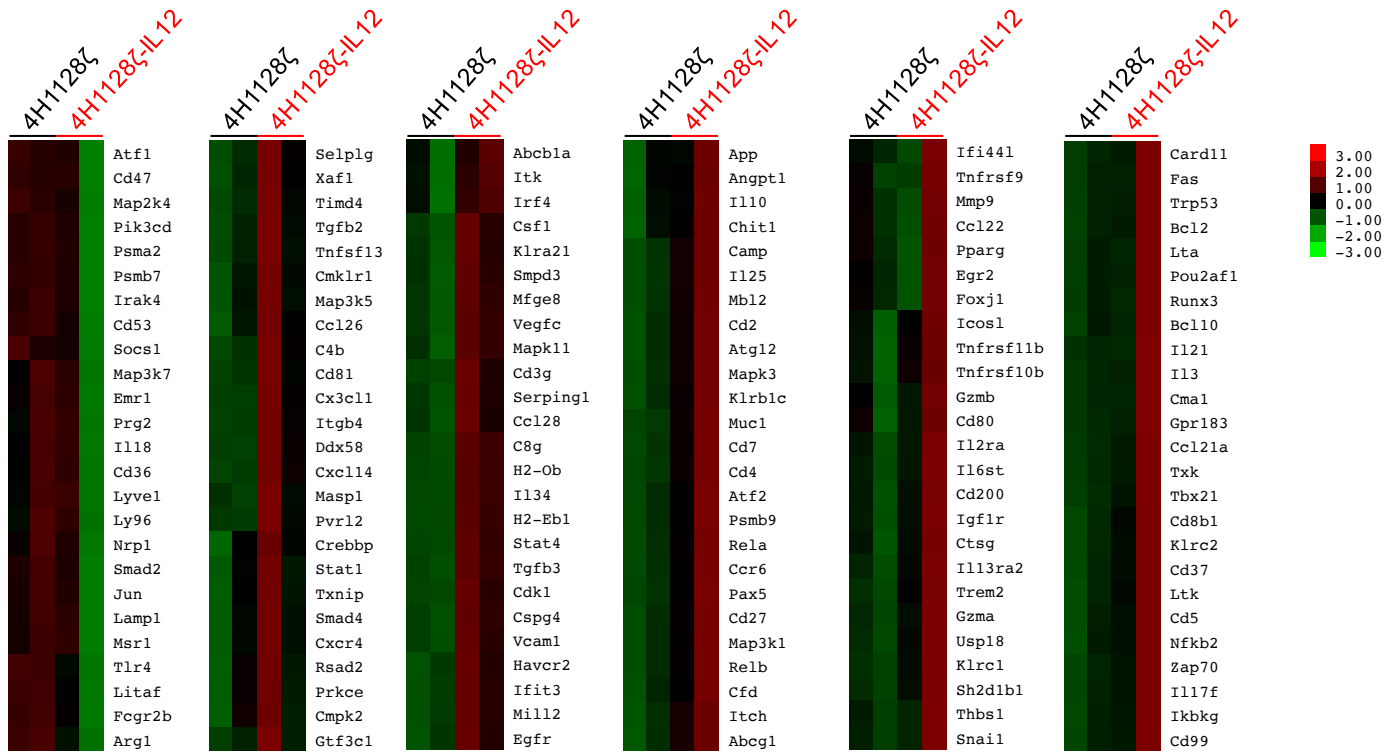

b

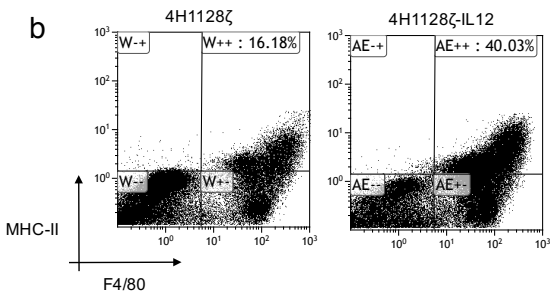

c

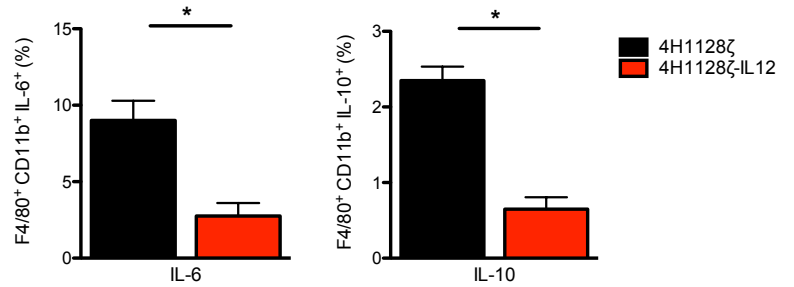

d

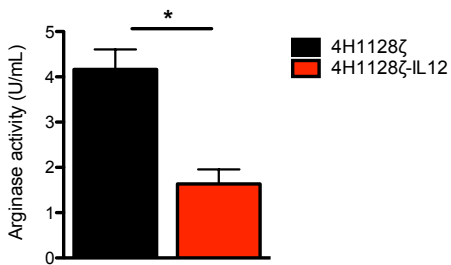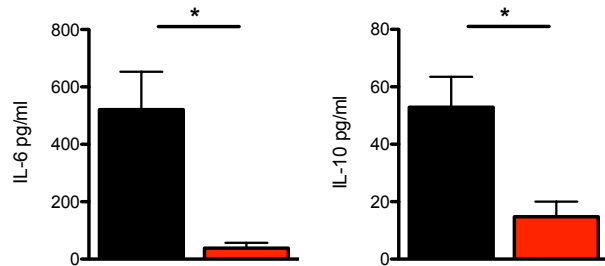

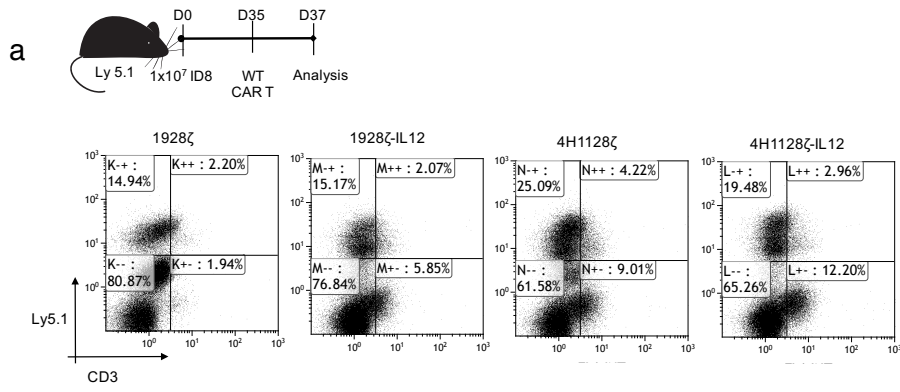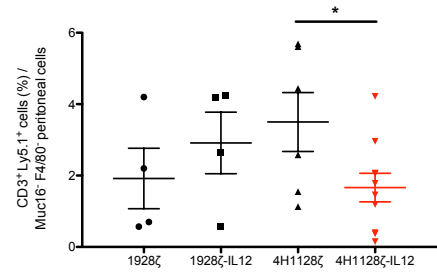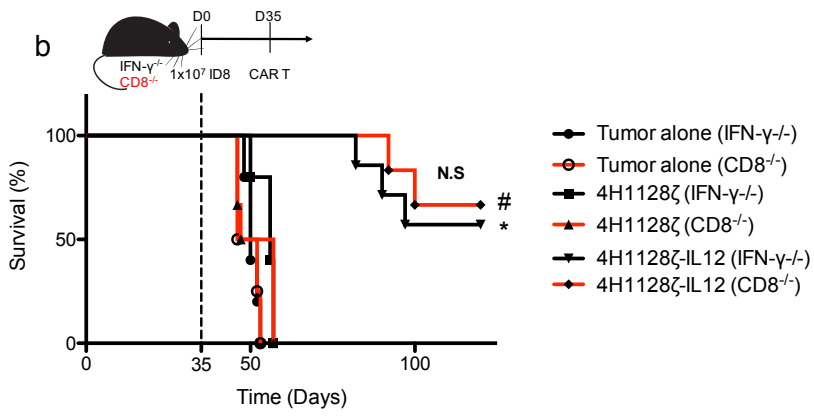

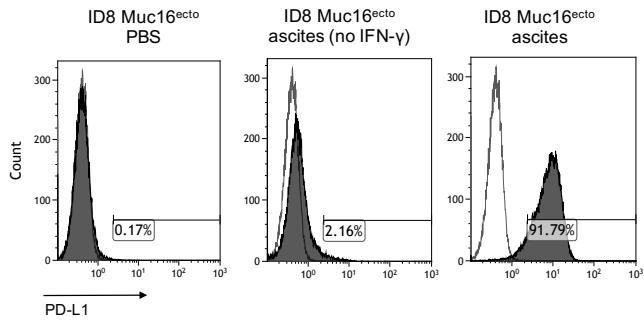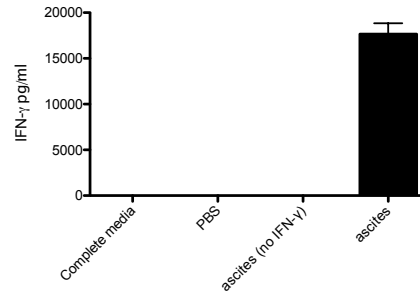



**a**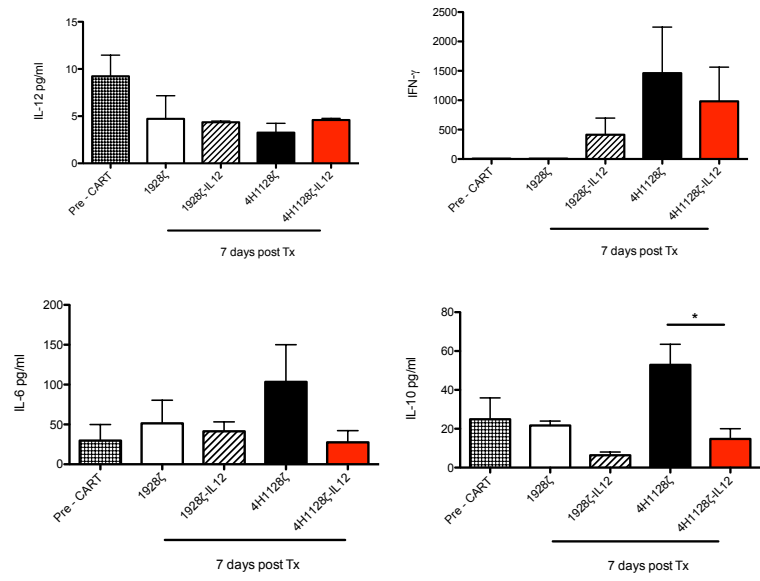**b**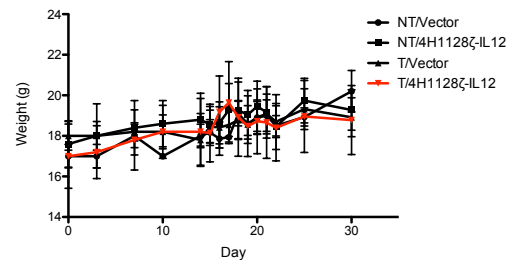**c**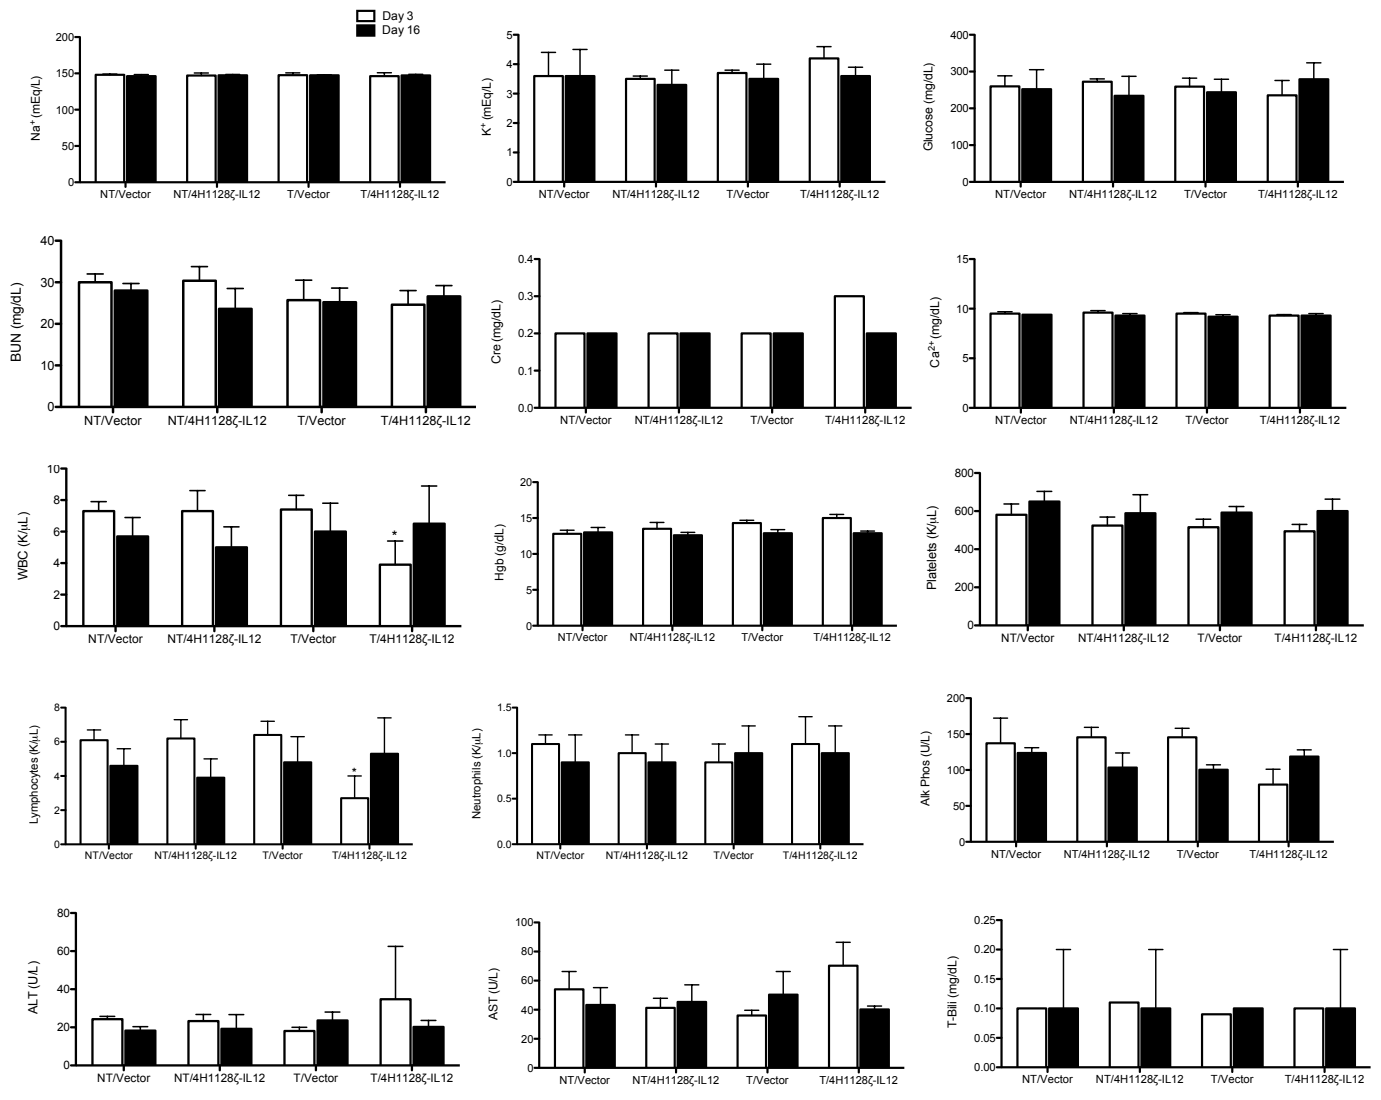

Supplement: 41598_2017_10940_MOESM1_ESM.pdf [file 41598_2017_10940_MOESM1_ESM.pdf]
